# Supplementary material for: Carbonaceous aerosols and their light absorption properties over the Bay of Bengal during continental outflow
Source: Royal Society of Chemistry journal article supplement (doi:10.1039/d1em00347j), 2021-10-20
Supplement: d1em00347j1.pdf [file d1em00347j1.pdf]

## **Supplementary Material**

### **Supplementary Material-1**

#### **Procedure for EC, OC and WSOC analyses.**

The EC-OC analyzing procedure is a two-stage process. In the first stage, OC fraction is volatilized by heating the sample step-wise in an inert condition (100% He) and later volatilizing EC fraction by step-wise heating the sample in an oxidizing medium (10% O<sub>2</sub> + 90% He, vol/vol). The evolved carbon fraction is oxidized to CO<sub>2</sub>, reduced to methane (CH<sub>4</sub>), and measured using a flame ionization detector. The transmittance of the laser source is continuously monitored. The split between EC and OC is demarcated by the return of transmittance value to its initial value. OC is defined as the fraction which evolved before the split and EC as the fraction that evolved after the split. OC and EC fractions are corrected for pyrolysis after the analysis. In addition to the samples collected onboard, blanks were also analyzed, and a correction was applied. The detection limits were found to be 0.31 µg m<sup>-3</sup> (using 3σ values of procedural blanks) for OC and 0.01 µg m<sup>-3</sup> (using 0.2 µg cm<sup>-2</sup> as instrument signal) for EC measurements. The repeated measurements yielded the uncertainty of 0.73 µg cm<sup>-2</sup> in the detection of OC and 0.17 µg cm<sup>-2</sup> in the detection of EC. The precision of these measurements were found within 5%. Consistency of instrument performance was evaluated by periodic analysis of laboratory made sucrose/potassium hydrogen phthalate solution.

In order to measure the water-soluble organic carbon (WSOC), a quarter of the filter was cut and transferred to a savillex vial under a clean laminar flow bench. The filters were soaked in 50ml of Milli-Q water (specific resistivity = 18.2 MΩ cm) for 3-4 hours following the initial ultrasonic treatment for 15 minutes. Subsequently, water extract was centrifuged, and the supernatant fraction was filtered using PVDF filters (0.45 µm pore size) and transferred

to a glass vial. An aliquot of this water extract was stored in pre-cleaned polypropylene bottles at -19 °C and later used for analyses of cations and anions using Ion Chromatography. A Shimadzu TOC-LCPH analyzer was used to determine TOC concentrations (Dickson et al., 2007). Standardization was achieved using potassium hydrogen phthalate. A 5-point calibration curve was generated before each batch. WSOC was analyzed at 680°C following combustion catalytic oxidation method. Triplicate analysis was done for each sample. CRM (Deep Sea TOC standard; 41–44 µM) procured from the University of Miami was run in each batch, and the accuracy of the analysis was  $\pm 1$  µM. 25 µL of water-extract was injected into the furnace packed with Pt catalyst at a temperature of 680 °C. The evolved CO<sub>2</sub> was measured using a non-dispersive infrared (NDIR) detector to assess total carbon (TC) content. Another aliquot of the solution (100 µL) was acidified with 25% phosphoric acid (25% H<sub>3</sub>PO<sub>4</sub>, vol/vol), and the evolved CO<sub>2</sub> was considered as inorganic carbon (IC). WSOC concentration was obtained by subtracting IC values from TC.

## Supplementary Material-2

**Table listing all acronyms/symbols used in the manuscript**

|                                   |                                                         |
|-----------------------------------|---------------------------------------------------------|
| A <sub>365</sub>                  | Absorption at 365nm                                     |
| A <sub>700</sub>                  | Absorption at 700nm                                     |
| AAE                               | Absorption Angstrom Exponent                            |
| AAE <sub>BrC</sub>                | Absorption Angstrom Exponent of Brown Carbon            |
| AMBT                              | Air Mass Back Trajectories                              |
| ATN                               | Attenuation                                             |
| ATN <sub>EC-678</sub>             | Attenuation of Elemental Carbon at 678nm                |
| b <sub>abs-365</sub>              | Absorption Coefficient at 365nm                         |
| b <sub>abs-EC-678</sub>           | Absorption Coefficient of Elemental Carbon at 678nm     |
| b <sub>ATN-EC-678</sub>           | Attenuation Coefficient of Elemental Carbon at 678nm    |
| BC                                | Black Carbon                                            |
| BLH                               | Atmospheric Boundary Layer Height                       |
| BoB                               | Bay of Bengal                                           |
| BrC                               | Brown Carbon                                            |
| CAP                               | Continental Air Parcel                                  |
| CAP+MAP                           | Continental and Marine Air Parcel                       |
| EC                                | Elemental Carbon                                        |
| HVS                               | High Volume Sampler                                     |
| HYSPLIT                           | Hybrid Single-Particle Lagrangian Integrated Trajectory |
| IGP                               | Indo-Gangetic Plain                                     |
| MABL                              | Marine Atmospheric Boundary Layer                       |
| MAE                               | Mass Absorption Efficiency                              |
| MAE <sub>BrC</sub>                | Mass Absorption Efficiency of Brown Carbon              |
| MAE <sub>BrC-365</sub>            | Mass Absorption Efficiency of Brown Carbon at 365nm     |
| MAE <sub>EC-678</sub>             | Mass Absorption Efficiency of Elemental Carbon at 678nm |
| MAP                               | Marine Air Parcel                                       |
| MODIS                             | Moderate Resolution Imaging Spectroradiometer           |
| NEM                               | North East Monsoon                                      |
| NOAA                              | National Oceanic and Atmospheric Administration         |
| nss K <sup>+</sup>                | Non Sea Salt Potassium                                  |
| nss SO <sub>4</sub> <sup>2-</sup> | Non Sea Salt Sulphate                                   |
| OC                                | Organic Carbon                                          |
| ORV                               | Ocean Research Vessel                                   |
| PM <sub>10</sub>                  | Particulate Matter 10mm                                 |
| POM                               | Particulate Organic Matter                              |
| RRF                               | Relative Radiative Forcing                              |
| RRF <sub>BrC</sub>                | Relative Radiative Forcing of Brown Carbon              |
| SOA                               | Secondary Organic Aerosols                              |
| SOC                               | Secondary Organic Carbon                                |

|                   |                                            |
|-------------------|--------------------------------------------|
| SSD               | Sindhu Sadhana                             |
| SVOC              | Semi Volatile Organic Compounds            |
| TCA               | Total Carbonaceous Aerosol                 |
| TOC               | Total Organic Carbon                       |
| TOT               | Total Optical Transmission                 |
| V <sub>aero</sub> | Volume of the air filtered during sampling |
| V <sub>ext</sub>  | Volume of Milli-Q used to extract WSOC     |
| VOC               | Volatile Organic Compounds                 |
| WS <sub>Brc</sub> | Water Soluble Brown Carbon                 |
| WSOC              | Water Soluble Organic Carbon               |

Supplementary Figures:

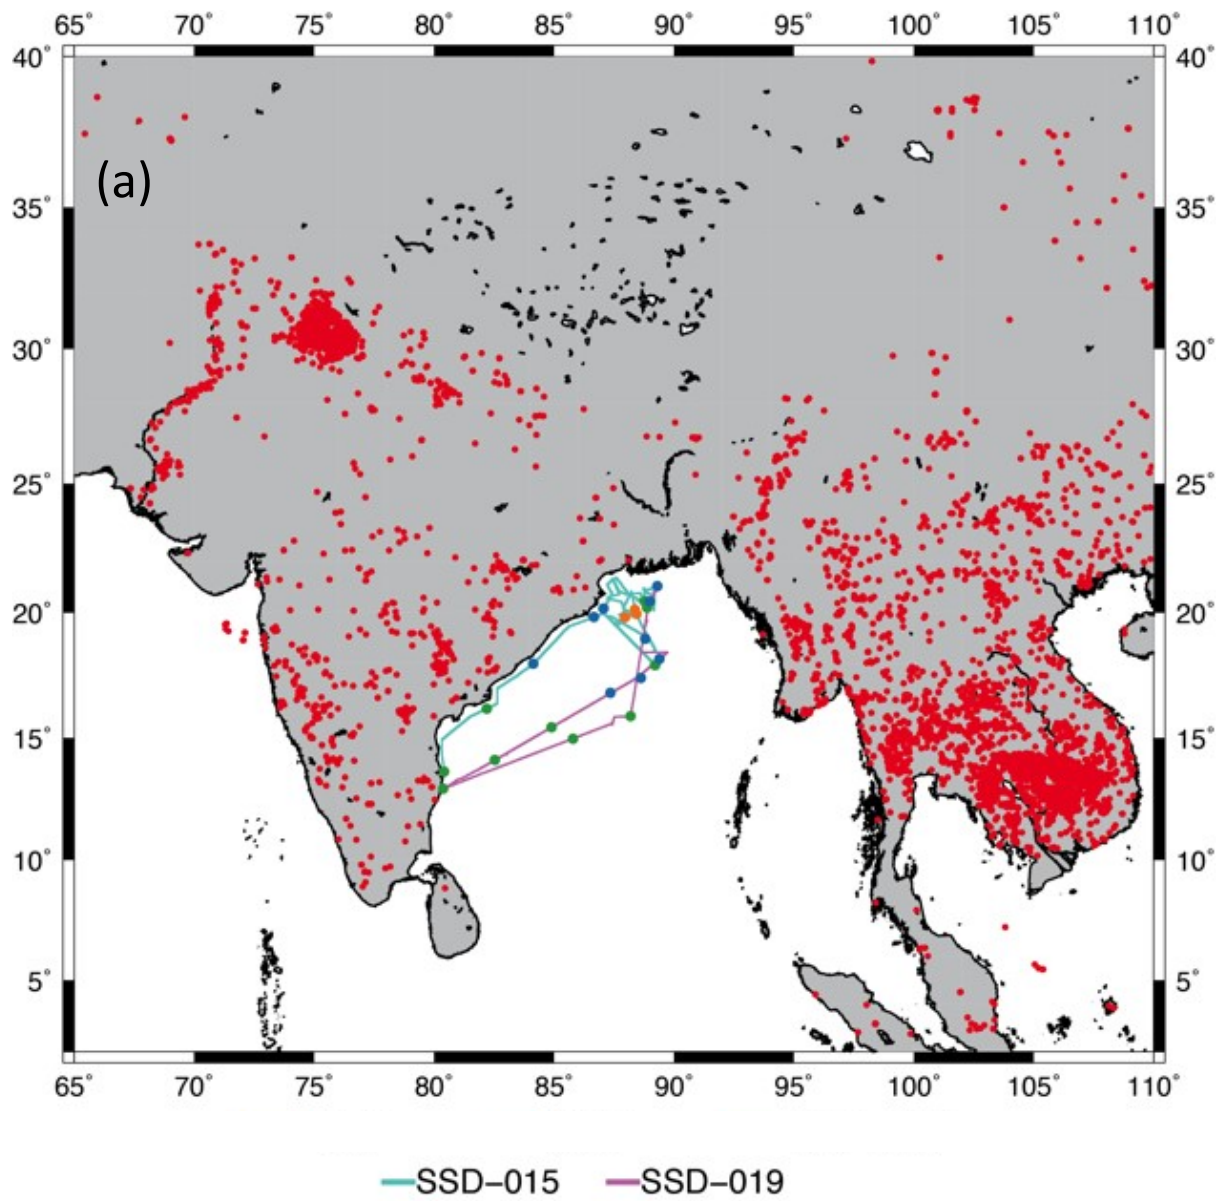

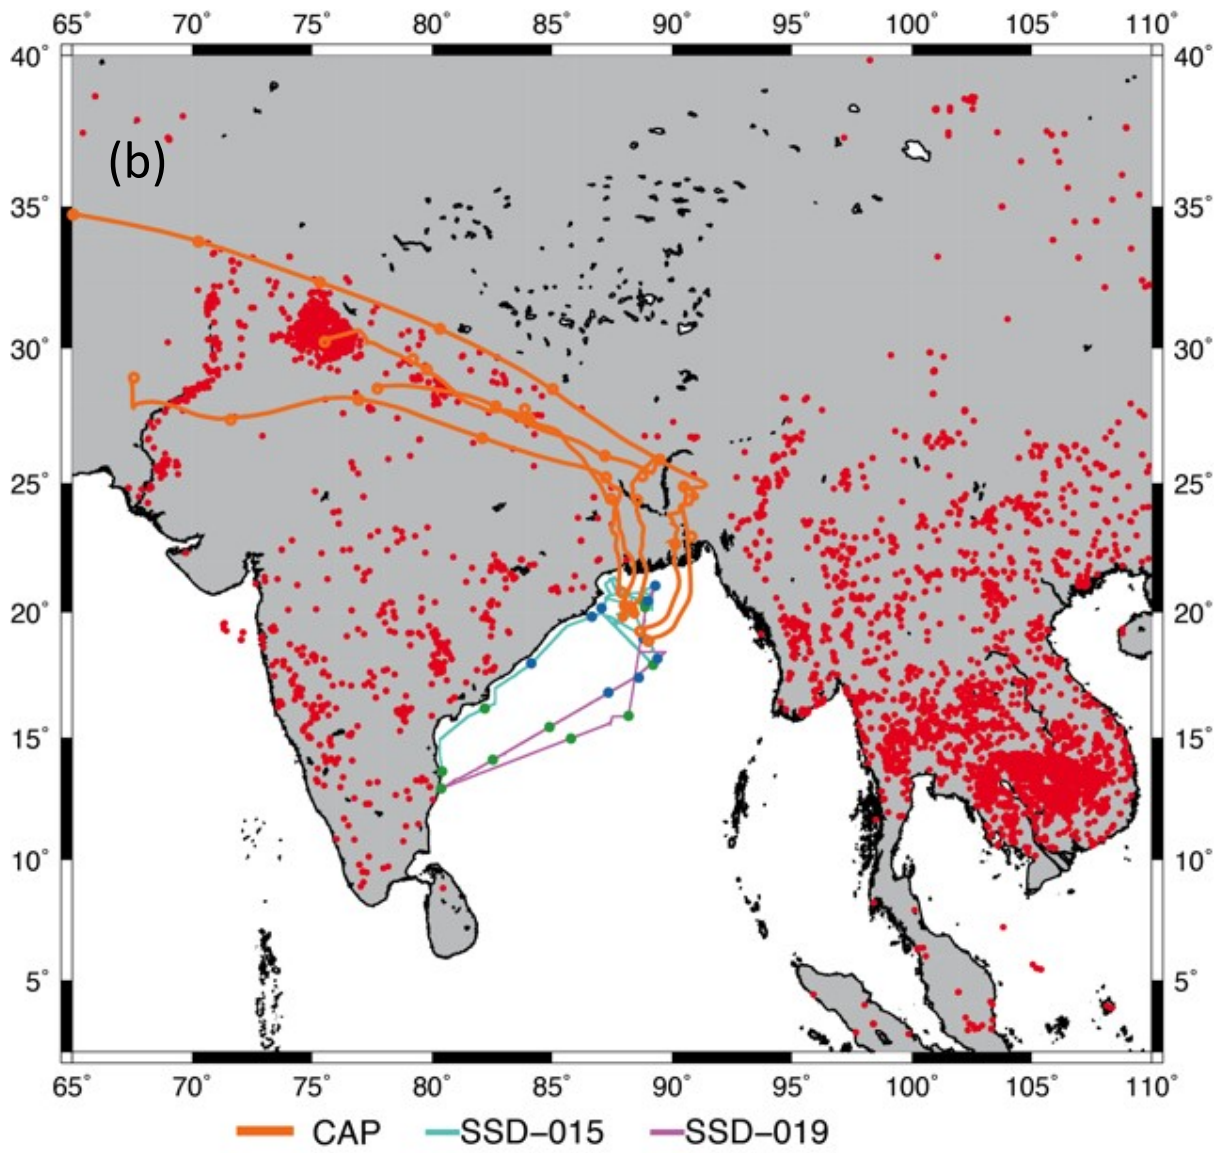

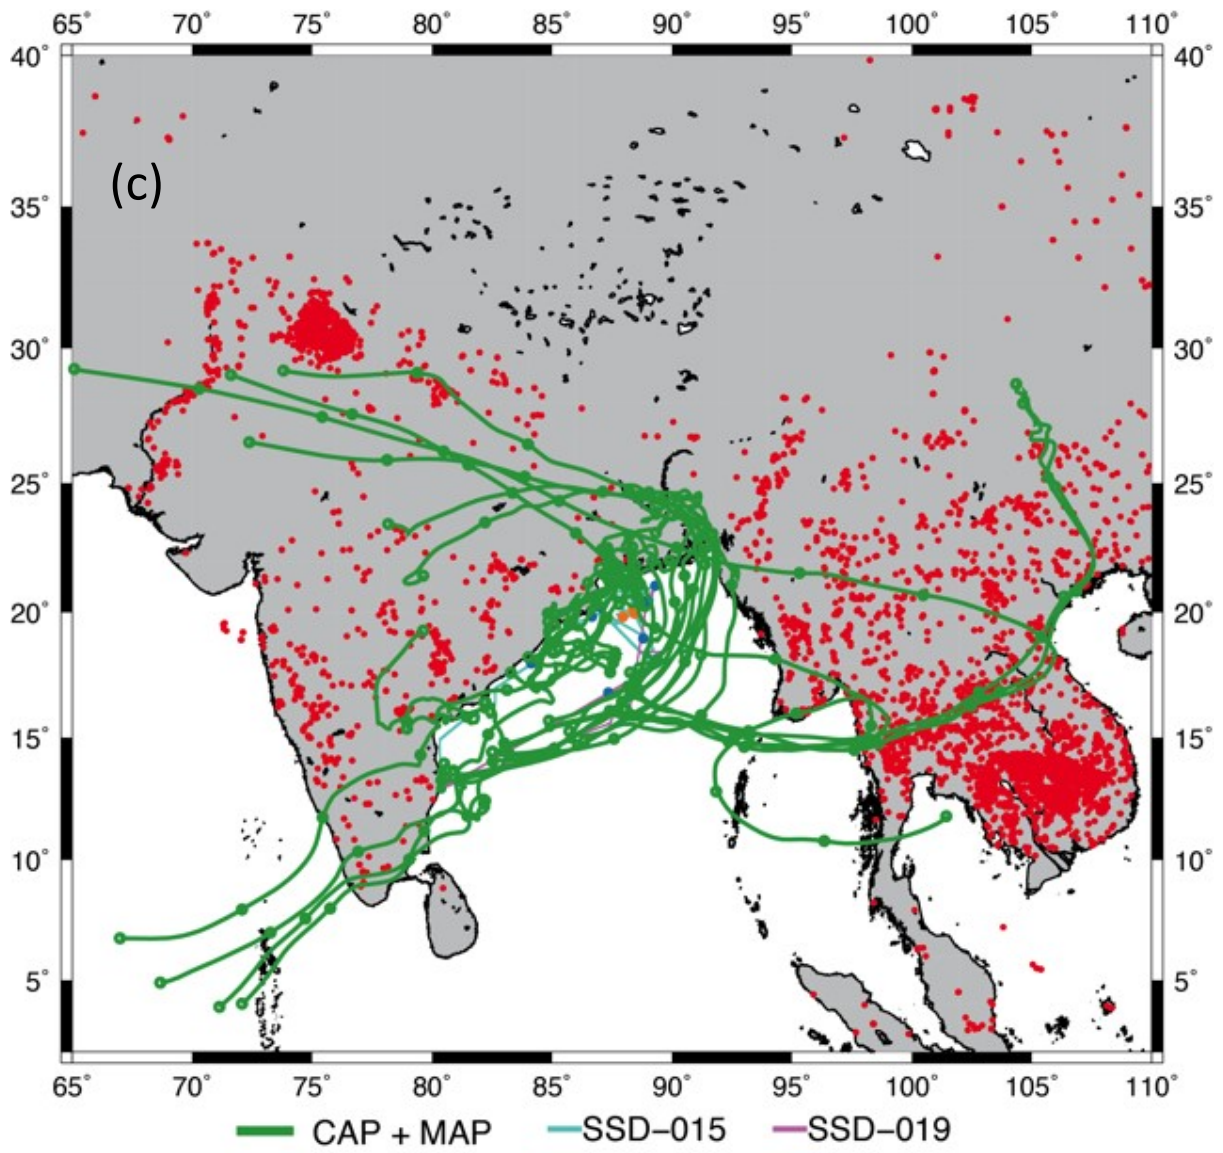



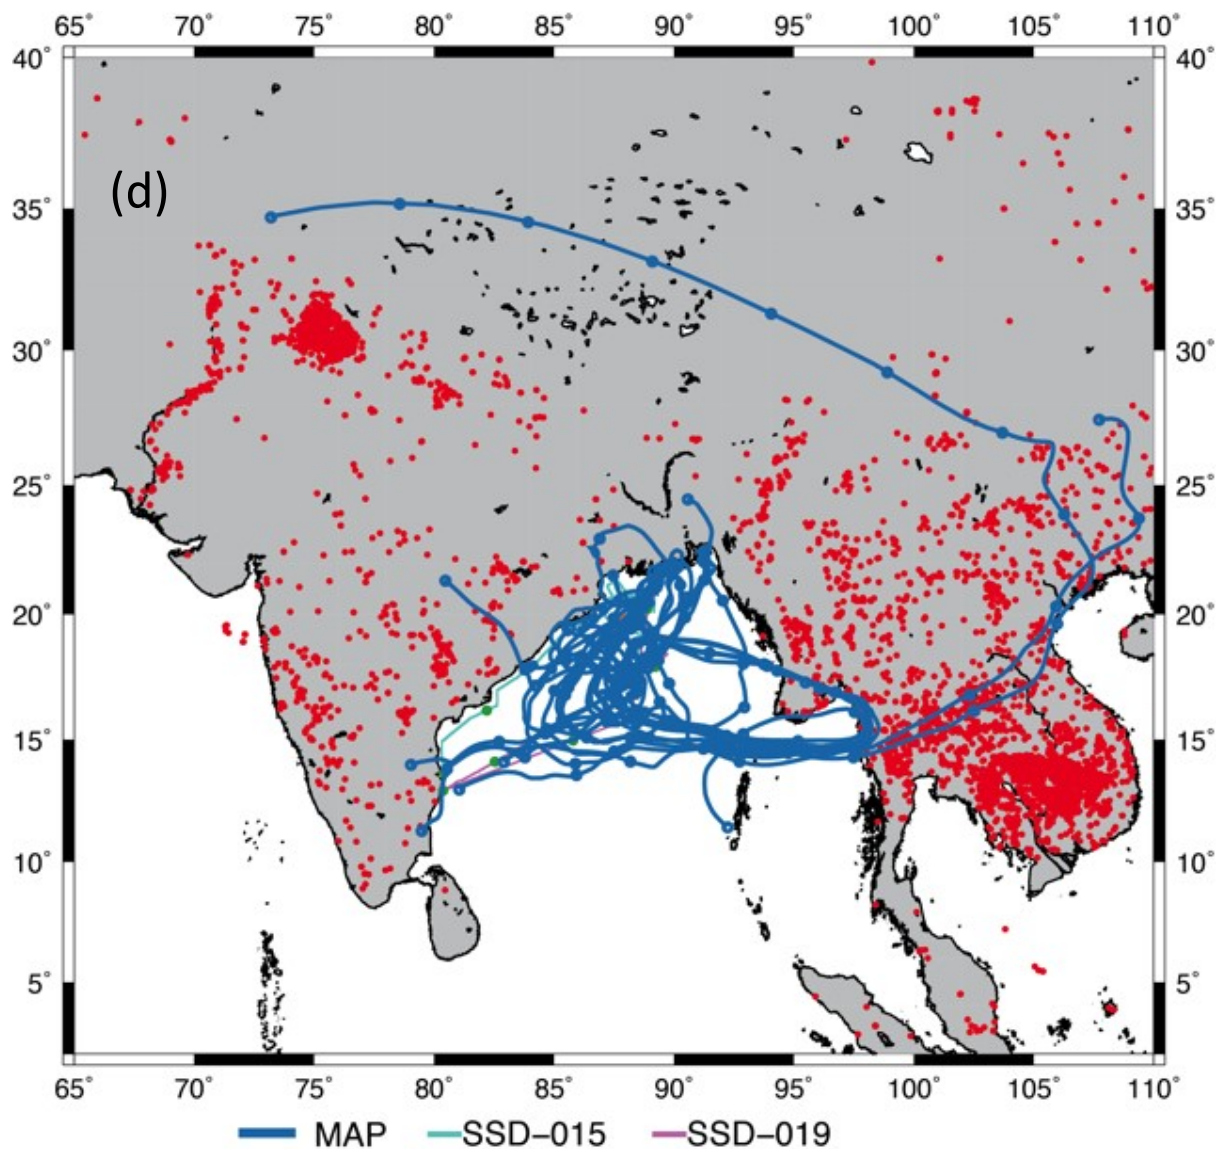

**Fig. S1:** (a) Map showing cruise track during SSD-15 and 19 over the Bay of Bengal. Red spots in the map are total fire counts (obtained from the MODIS aboard Terra satellite with detection confidence higher than 80%) during sampling period October-2015 and February-2016 over Indo-Gangetic Plains and southeast Asia to possibly detect the influence of biomass burning over the BoB. 7-day HYSPLIT Back-trajectories (at 500 m agl) ending at midpoint of sampling track used for collection of one aerosol sample for (b) CAP, (c) CAP+MAP, (d) MAP (see text for detail).



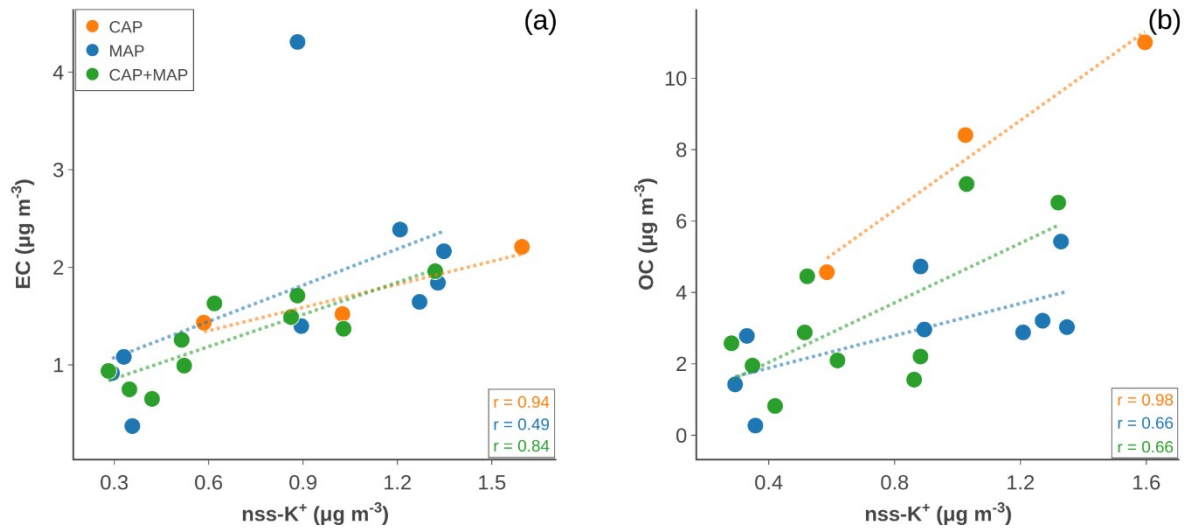

**Fig. S2:** Scatter plots between (a) EC and nss-K<sup>+</sup> and (b) OC and nss-K<sup>+</sup> over the BoB during winter continental outflow.

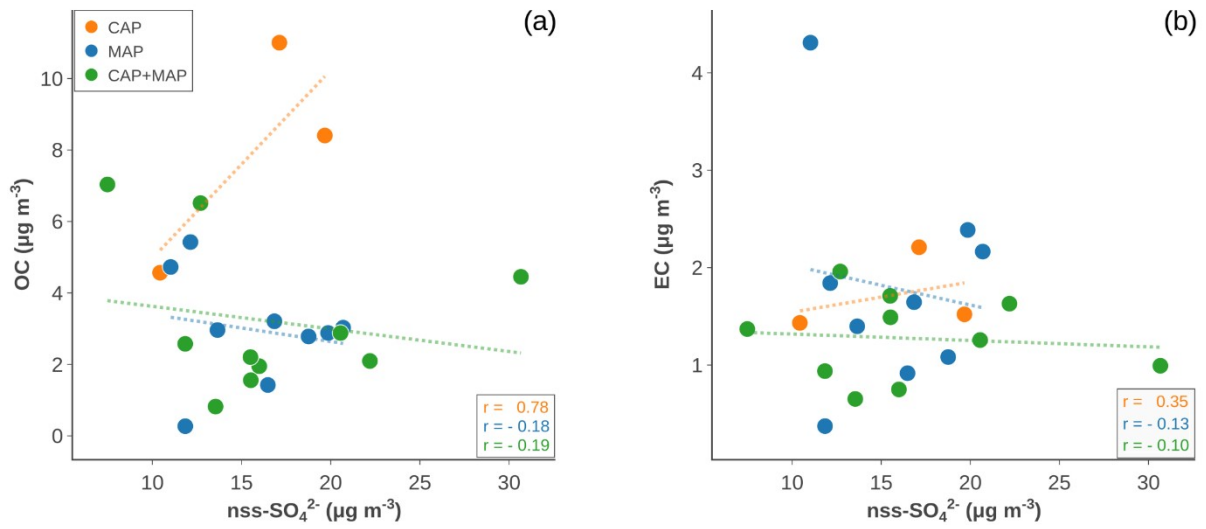

**Fig. S3:** Scatter plots between (a) OC and nss-SO<sub>4</sub><sup>2-</sup> and (b) EC and nss-SO<sub>4</sub><sup>2-</sup> over the BoB during winter continental outflow.

### References:

Dickson, A.G., Andrew G., Sabine, C.L., Christian, J.R., North Pacific Marine Science Organization., 2007. Guide to best practices for ocean CO<sub>2</sub> measurements. North Pacific Marine Science Organization.
